# Supplementary material for: Inhibition of MicroRNA-92a Improved Erectile Dysfunction in Streptozotocin-Induced Diabetic Rats via Suppressing Oxidative Stress and Endothelial Dysfunction
Source: PubMed Central journal article supplement — World J Mens Health. 2022 Feb 24;41(1):142–54. doi: 10.5534/wjmh.210177 (PMC9826907; doi:10.5534/wjmh.210177), 2022-02-24
Supplement: wjmh-41-142-s002.pdf [file wjmh-41-142-s002.pdf]

**Supplement Table 1.** Details of the antibodies

| Antibody                 | Dilution | Product vendor            |
|--------------------------|----------|---------------------------|
| eNOS                     | 1:1,000  | Abcam                     |
| p-eNOS (Ser1177)         | 1:500    | Abcam                     |
| nNOS                     | 1:1,000  | Abcam                     |
| VE-cadherin              | 1:1,000  | Cell Signaling Technology |
| Occludin                 | 1:500    | Cell Signaling Technology |
| Claudin-5                | 1:500    | Cell Signaling Technology |
| CD31                     | 1:1,000  | Abcam                     |
| p22phox                  | 1:1,000  | Affinity                  |
| p47phox                  | 1:1,000  | Affinity                  |
| gp91phox                 | 1:1,000  | Affinity                  |
| HO-1                     | 1:500    | Abcam                     |
| $\beta$ -actin           | 1:1,000  | Abcam                     |
| Anti-rabbit HRP Ab       | 1:1,000  | Abcam                     |
| Anti-mouse HRP Ab        | 1:1,000  | Abcam                     |
| IF staining secondary Ab | 1:200    | Servicebio                |

IF: immunofluorescence, HRP: horseradish peroxidase, Ab: antibody.
