# Supplementary material for: Inhibition of MicroRNA-92a Improved Erectile Dysfunction in Streptozotocin-Induced Diabetic Rats via Suppressing Oxidative Stress and Endothelial Dysfunction
Source: PubMed Central journal article supplement — World J Mens Health. 2022 Feb 24;41(1):142–54. doi: 10.5534/wjmh.210177 (PMC9826907; doi:10.5534/wjmh.210177), 2022-02-24
Supplement: wjmh-41-142-s003.pdf [file wjmh-41-142-s003.pdf]

**Supplement Table 2.** Primer sequences for qRT-PCR

| Gene name          | Primer name         | Primer sequence      |
|--------------------|---------------------|----------------------|
| <i>rat Prkaa1</i>  | rat Prkaa1-Forward  | ATCCGCAGAGAGATCCAGAA |
|                    | rat Prkaa1-Reverse  | CGTCGACTCTCCTTTTCGTC |
| <i>rat Prkaa2</i>  | rat Prkaa2-Forward  | GCTGTGGATCGCCAAATTAT |
|                    | rat Prkaa2-Reverse  | GCATCAGCAGAGTGGCAATA |
| <i>rat eNOS</i>    | rat eNOS-Forward    | CTGCTGCCCGAGATATCTTC |
|                    | rat eNOS-Reverse    | CAGGTACTGCAGTCCCTCCT |
| <i>rat HO-1</i>    | rat HO-1-Forward    | CACCAGCCACACAGCACTAC |
|                    | rat HO-1-Reverse    | CACCCACCCCTCAAAAGACA |
| <i>rat β-actin</i> | rat β-actin-Forward | ATCTGGCACCACACCTTC   |
|                    | rat β-actin-Reverse | AGCCAGGTCCAGACGCA    |
