# Supplementary material for: Inhibition of MicroRNA-92a Improved Erectile Dysfunction in Streptozotocin-Induced Diabetic Rats via Suppressing Oxidative Stress and Endothelial Dysfunction
Source: PubMed Central journal article supplement — World J Mens Health. 2022 Feb 24;41(1):142–54. doi: 10.5534/wjmh.210177 (PMC9826907; doi:10.5534/wjmh.210177), 2022-02-24
Supplement: wjmh-41-142-s004.pdf [file wjmh-41-142-s004.pdf]

**Supplement Table 3.** Predicted target genes

---

|                |                |                 |                |                |                |                |
|----------------|----------------|-----------------|----------------|----------------|----------------|----------------|
| <i>PRKAA2</i>  | <i>NUTF2</i>   | <i>TGIF1</i>    | <i>CPLX1</i>   | <i>GRID2</i>   | <i>XYLT2</i>   | <i>ESRRG</i>   |
| <i>ADCY3</i>   | <i>RAP1B</i>   | <i>HAS2</i>     | <i>BCAT2</i>   | <i>CREB3L2</i> | <i>SERTAD3</i> | <i>NR4A3</i>   |
| <i>SLC6A1</i>  | <i>YIPF4</i>   | <i>CDCA7L</i>   | <i>WRNIP1</i>  | <i>NSG1</i>    | <i>NECAP1</i>  | <i>MAFK</i>    |
| <i>PLEKHM1</i> | <i>GRK5</i>    | <i>HAS3</i>     | <i>AZIN1</i>   | <i>STK39</i>   | <i>MGLL</i>    | <i>CDC27</i>   |
| <i>VPS54</i>   | <i>CACNA1C</i> | <i>AKAP1</i>    | <i>FKBP1A</i>  | <i>DNAJC4</i>  | <i>SLC1A1</i>  | <i>HERPUD2</i> |
| <i>FAM110B</i> | <i>CEND1</i>   | <i>IBSP</i>     | <i>CLDN11</i>  | <i>SAR1B</i>   | <i>NSF</i>     | <i>SPRYD4</i>  |
| <i>STRN</i>    | <i>KLF4</i>    | <i>CHKA</i>     | <i>ITM2B</i>   | <i>NEGR1</i>   | <i>EBAG9</i>   | <i>USF2</i>    |
| <i>PPCS</i>    | <i>SLC9A1</i>  | <i>SLC38A2</i>  | <i>GRAMD3</i>  | <i>TWIST1</i>  | <i>SSBP3</i>   | <i>CDKN1C</i>  |
| <i>FSTL1</i>   | <i>COPS2</i>   | <i>CXXC5</i>    | <i>CCNJL</i>   | <i>LRRC4</i>   | <i>EGR2</i>    | <i>DNAJB9</i>  |
| <i>LUZP1</i>   | <i>GLRA1</i>   | <i>GCLM</i>     | <i>SNN</i>     | <i>TWF1</i>    | <i>ISCA1</i>   | <i>ARF1</i>    |
| <i>RPS6KB1</i> | <i>HPS6</i>    | <i>SLC32A1</i>  | <i>MOAP1</i>   | <i>DAB2IP</i>  | <i>JOSD1</i>   | <i>RNF4</i>    |
| <i>AQP2</i>    | <i>UBE2G1</i>  | <i>TCF21</i>    | <i>GPM6A</i>   | <i>KCND2</i>   | <i>BGN</i>     | <i>RGS3</i>    |
| <i>BAK1</i>    | <i>FASLG</i>   | <i>CDC42EP2</i> | <i>HAND1</i>   | <i>FMR1</i>    | <i>ADM</i>     | <i>PRKAR1B</i> |
| <i>GATA2</i>   | <i>PIP5K1C</i> | <i>CD69</i>     | <i>PER2</i>    | <i>CLPX</i>    | <i>CHST7</i>   | <i>RAP1A</i>   |
| <i>DPY30</i>   | <i>SDC2</i>    | <i>TEF</i>      | <i>DCLK2</i>   | <i>ERGIC2</i>  | <i>BTG2</i>    | <i>CACNA1H</i> |
| <i>RAD21</i>   | <i>KCNK10</i>  | <i>ANGPTL2</i>  | <i>NPTN</i>    | <i>DDIT4</i>   | <i>CNTN4</i>   | <i>H3F3B</i>   |
| <i>CLK3</i>    | <i>CDC42</i>   | <i>FAM160A2</i> | <i>NEFM</i>    | <i>ST13</i>    | <i>GAP43</i>   | <i>MTDH</i>    |
| <i>TRAK2</i>   | <i>GOLGA7</i>  | <i>SPHK2</i>    | <i>TRIP12</i>  | <i>FOXP1</i>   | <i>UGP2</i>    | <i>COL1A2</i>  |
| <i>INSIG1</i>  | <i>FAM133B</i> | <i>SMAD7</i>    | <i>SLC12A2</i> | <i>FAM126B</i> | <i>DUSP6</i>   | <i>RNF44</i>   |
| <i>SLC12A5</i> | <i>MARCH3</i>  | <i>NRAS</i>     | <i>SLC17A6</i> | <i>NFIA</i>    | <i>GPR180</i>  | <i>DKK3</i>    |
| <i>SNAI1</i>   | <i>DUSP5</i>   | <i>ATXN3</i>    | <i>DUSP1</i>   | <i>TOB1</i>    | <i>MCFD2</i>   | <i>BMPR1A</i>  |
| <i>ITPR1</i>   |                |                 |                |                |                |                |

---
