# Supplementary material for: Inhibition of MicroRNA-92a Improved Erectile Dysfunction in Streptozotocin-Induced Diabetic Rats via Suppressing Oxidative Stress and Endothelial Dysfunction
Source: PubMed Central journal article supplement — World J Mens Health. 2022 Feb 24;41(1):142–54. doi: 10.5534/wjmh.210177 (PMC9826907; doi:10.5534/wjmh.210177), 2022-02-24
Supplement: wjmh-41-142-s005.pdf [file wjmh-41-142-s005.pdf]

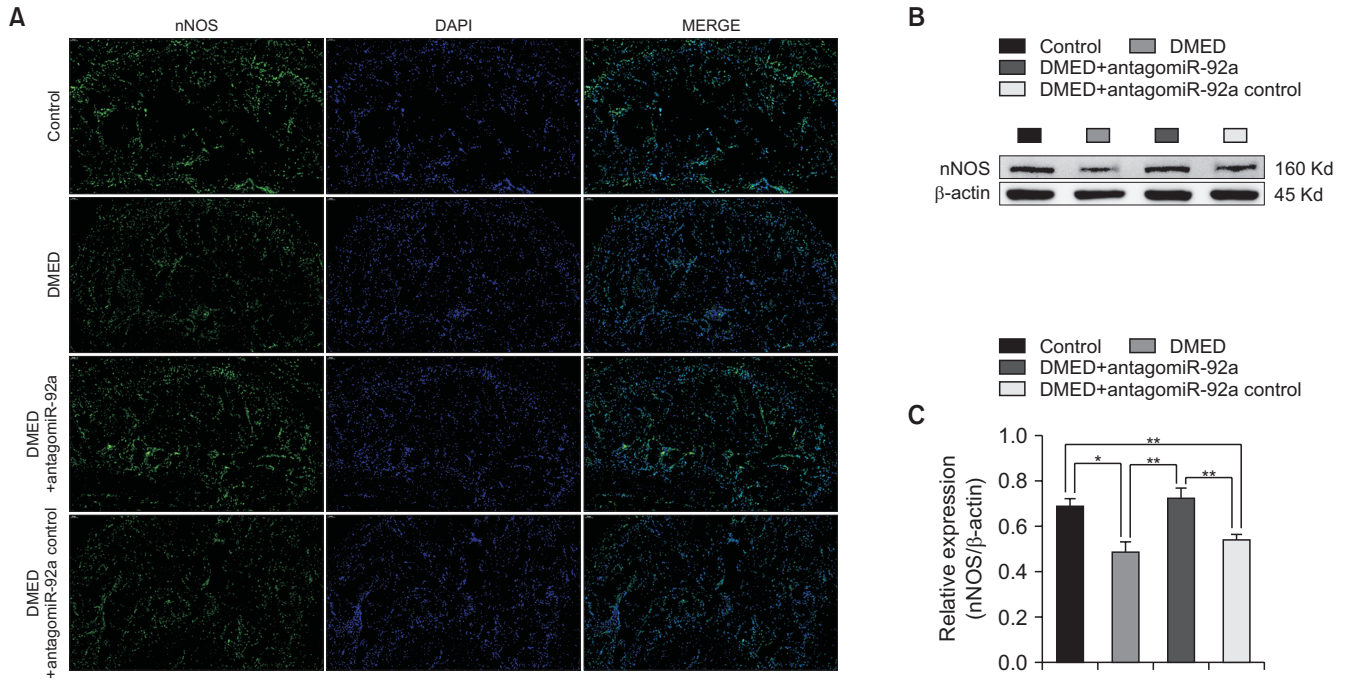

**Supplement Fig. 1.** The miR-92a antagomir improved erectile function *via* amelioration of nNOS expression. (A) Representative immunofluorescence result of nNOS in the corpus cavernosum of rats of all four groups at  $\times 100$  magnification. (B) Representative western blot results of nNOS in the corpus cavernosum of all rats. (C) The expression levels of nNOS, with  $\beta$ -actin as the loading control, in the corpus cavernosum of each group are presented as bar graphs ( $n=4$  per group). Data are mean $\pm$ SEM. \* $p<0.05$ , \*\* $p<0.01$ , \*\*\* $p<0.001$ . DMED: diabetic erectile dysfunction group.
