# Supplementary material for: Inhibition of MicroRNA-92a Improved Erectile Dysfunction in Streptozotocin-Induced Diabetic Rats via Suppressing Oxidative Stress and Endothelial Dysfunction
Source: PubMed Central journal article supplement — World J Mens Health. 2022 Feb 24;41(1):142–54. doi: 10.5534/wjmh.210177 (PMC9826907; doi:10.5534/wjmh.210177), 2022-02-24
Supplement: wjmh-41-142-s006.pdf [file wjmh-41-142-s006.pdf]

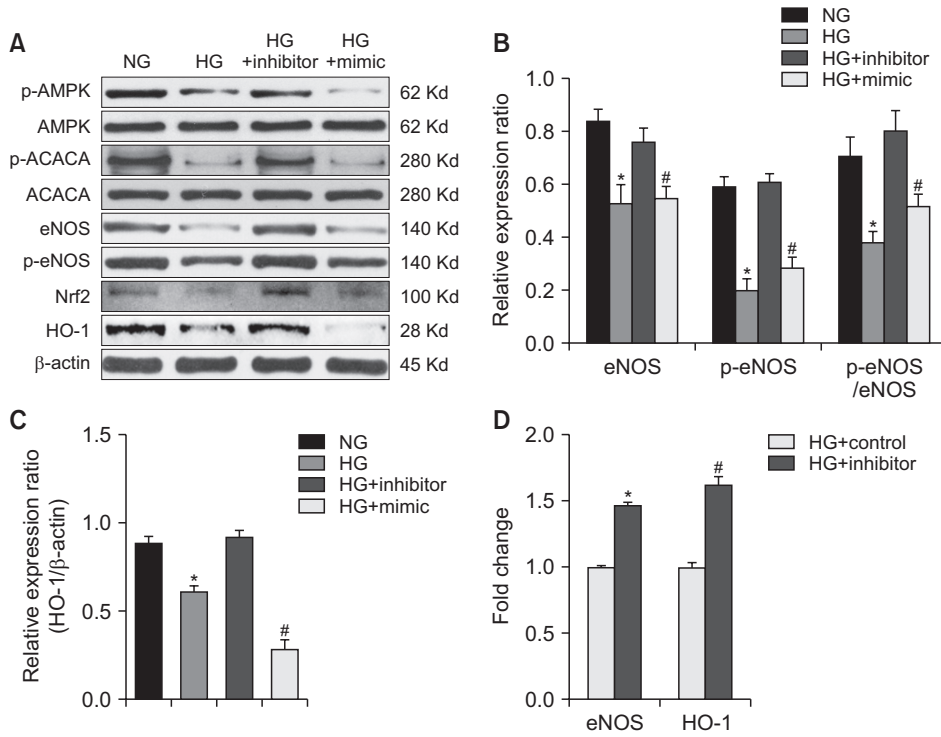

**Supplement Fig. 2.** Inhibition of miR-92a improved erectile function via amelioration of the AMPK/eNOS and AMPK/Nrf2/HO-1 signaling pathway *in vitro*. (A) Representative western blot results of AMPK/eNOS and AMPK/Nrf2/HO-1 signaling pathway in endothelial cells in each group. (B, C) The expression levels of eNOS, p-eNOS, and HO-1, with β-actin as the loading control, and the relative ratio of p-eNOS/eNOS in the corpus cavernosum of each group are presented as bar graphs (n=4–5 per group). (D) qRT-PCR analysis showing miR-92a inhibitor reactivated the expression of eNOS and HO-1 (n=4–5 per group). \*,#p<0.05 versus the control group. qRT-PCR: quantitative real-time polymerase chain reaction, NG: normal glucose (5 mmol/L), HG: high glucose (30 mmol/L).
